# Supplementary material for: Characterization and Incidence of the First Member of the Genus Mitovirus Identified in the Phytopathogenic Species Fusarium oxysporum
Source: MDPI journal article supplement (doi:10.3390/v12030279), 2020-03-03
Supplement: s1 [file s1]

**Supplementary table 2.-Amino acid identities between FodMV1 and other mitoviruses**

| <b>Mitovirus</b>                              | <b>Acronym</b>               | <b>Coding region<br/>aa identity<br/>(%)<sup>a</sup></b> | <b>GenBank<br/>accesión no.</b> |
|-----------------------------------------------|------------------------------|----------------------------------------------------------|---------------------------------|
| <b>Botrytis cinerea mitovirus 1</b>           | BcMV1                        | 15%                                                      | EF580100                        |
| <b>Fusarium poae mitovirus 4</b>              | FpMV4                        | 14%                                                      | NC030864                        |
| <b>Fusarium boothi mitovirus 1</b>            | FbMV1                        | 13%                                                      | LC425114                        |
| <b>Fusarium poae mitovirus 3</b>              | FpMV3                        | 14%                                                      | NC030863                        |
| <b>Entomophthora muscae mitovirus 7</b>       | EnmuMV7                      | 34%                                                      | QCF24458                        |
| <b>Hubei-Narna-like virus 25</b>              | Hubei-Narna-like virus<br>25 | 33%                                                      | YP_009336494                    |
| <b>Rhizoctonia solani mitovirus 10</b>        | RsMV10                       | 38%                                                      | ALD89102                        |
| <b>Sclerotinia sclerotiorum mitovirus 26</b>  | SsMV26                       | 40%                                                      | AWY10984                        |
| <b>Sclerotinia sclerotiorum mitovirus 6-A</b> | SsMV6-A                      | 29%                                                      | AWY10967                        |
| <b>Sclerotinia sclerotiorum mitovirus 32</b>  | SsMV32                       | 28%                                                      | AWY10990                        |
| <b>[Loramyces juncicola mitovirus 1</b>       | LjMV1                        | 31%                                                      | AZT88622                        |
| <b>Ophiocordyceps sinensis mitovirus 2</b>    | OsMV2                        | 27%                                                      | AZT88624                        |
| <b>Fusarium circinatum mitovirus 1</b>        | FcMV1                        | 17%                                                      | KF803546                        |
| <b>Fusarium globosum mitovirus 1</b>          | FgMV1                        | 18%                                                      | LC006128                        |
| <b>Fusarium coeruleum mitovirus 1</b>         | FcoMV1                       | 17%                                                      | LC006129                        |
| <b>Fusarium poae mitovirus 2</b>              | FpMV2                        | 17%                                                      | YP_009272899                    |
| <b>Fusarium circinatum mitovirus 2-2</b>      | FcMV2-2                      | 19%                                                      | KF803548                        |
| <b>Fusarium poae mitovirus 1</b>              | FpMV1                        | 17%                                                      | YP009272898                     |
| <b>Fusarium circinatum mitovirus 2-1</b>      | FcMV2-1                      | 16%                                                      | KF803547                        |
| <b>Helicobasidium mompa mitovirus 1-18</b>    | HmV1-18                      | 18%                                                      | AB110977                        |
| <b>Cryphonectria cubensis mitovirus 1a</b>    | CcMV1a                       | 17%                                                      | AY328476                        |
| <b>Cryphonectria parasitica mitovirus 1</b>   | CpMV1                        | 15%                                                      | L31849                          |
| <b>Saccharomyces 20S RNA narnavirus</b>       | ScNV-20S                     | 9%                                                       | AF039063                        |
| <b>Saccharomyces 23S RNA narnavirus</b>       | ScNV-23s                     | 7%                                                       | U90136                          |

<sup>a</sup>Percentage of identity between the amino acid sequences of the listed mitoviruses and the amino acid sequence of FodMV1.
