# Supplementary material for: Characterization and Incidence of the First Member of the Genus Mitovirus Identified in the Phytopathogenic Species Fusarium oxysporum
Source: MDPI journal article supplement (doi:10.3390/v12030279), 2020-03-03
Supplement: s1 [file s1]

## >FodMV1

CAACUUUAUGGUGGAGUUGCUGAUGGUUCGGGUACUGAACACUAUCAACAACUCUAUGAUUAACAUUAUU  
UAU **UGA** GAGGUUGAAAAACAUAAGGCCUUGCAUGAAGGUCGCAUCUUUCCUAAGGUUUUUUGUCCCCCA  
AGUUCAUACCAUGUUAUUACAGCGUCAUUGUC **AUG** AAAUUAAGGAGCAUGGAUGUAUUGCGCCAAGACAG  
AGGUCCCACAGCAGUGUCUGCUCGCCAAUGUCUUCUGCAUUGGUGCAAUGCCUUUCACUGUAUUUGCAAGA  
UUCAAGCGUUUCUAAUCACAGAGUAUGAUCCCCGGCCCCAAAUUAGAUACAAAGGAGUCAGCUUCUGGGCCA  
CCACAUAAGUUGCCAGAGGAUCCCCUCCAGCUCGACAUAGAGAAUUUGUUCCCCAAAUCCGUAAAGACCA  
UGAUUACGCCAAGCUAAGGGGAGAAUUGAAUUCUGGGCCCUCAUGAGGAACUCAUACAA **UGA** GACAUUGAC  
UAUAAUGGUUCCUUUCUCCGUCUCUUGUACGACGAGUCCUCGGGAGGCCUGCCGAAAGCAGUGGUGGUCGC  
AGAUGGUGCCUUCUGGAAAUCGAUGGGGUACCAUAGGUUACUGAGGACUCAGGAGACGGAUCAUUGGAUA  
GUAGAGCAUUUGGAAGUGACUUUGAUUCACAAAUUUGGCCAUGGUGGAUGGGUAACUGGAUUGGCAGUCA  
UCUGGAAACAAUCUAAGUCGGGGGCAUCCGAGGCUGUAGACCAUGAUUACGCCAAGCUAGGUGGAACUAA  
AAUGAAAAAUUUCUCACUAAUCUAGAAGAAGGAAGUACAUCUUUAUCUAAAUUCUUUAUCUCCUUUACA  
AAUAAAGGAGAUAUUUUUAGAAAAUUAACAUCUUUUUCGGAUAAAGGAGGGGAAGACGAGAGUAAUAGCUA  
UCCUUGACUAUUUUAGUCAAGUGUGCUAAAACCCUUACAUCUUUACCUCUUUAAUUUUCUAAAGAAAAU  
AGAUCAAGAUUGUACUUUCGACCAGAAUCCUUUAAGCAAAAGACAGCAGACUGGGAGAUUCUAAUACAGU  
GUGGAUUUAAAAUCCGCCACUGAUAGAUUCCGAUCAGUCUAAUCUGCCAAGUGCUUAAAGGGAGACUUC  
CUGCUGCCUAUGUAGAGGCA **UGA** UUGGACAUAAGGUAGGGUAUCCCUUUUUCUCGGGUAACCAACAGUA  
UAGUUAUGCUGUCGGGAAUCCGAUGGGAGCCUACUCAUCAUGGUCAUCAUUUACUCUAACACAUCACUAU  
AUCUUCUUCUUUAUUUCUAAAGAAUAGGUUAUCCUUUUAAACAGUUGAAUACUGUCUUCUAGGAGAUG  
AUGUGUUAUAGGGCAGGCUGAUUAAGCACAGAUUGUAUAUGGAGAUAAUGAAGAAUCUUGGAGUAGAGAU  
UUCUCUUGCCAAGACUCACAUUUCUCCACAUUUCUGUGAAUUUGCUAAACAGCUUAUUUAUAGAAAAGAG  
AACAUACUCCAUAUCCAUAUUCUGCUUUGAAACAUAGUAAAUCUAGUGAUCUUAUCACUAGUCUACUAG  
UUUCUUAACAGAGAAAAAGGAUGGAUUGUUGCUUCUAUACCAAGUGCUGUAUCAGAUUUCUUGGCAGAGU  
CAGAGAACUCCUUCUAGAGUUAGAAAGAAGGCAUUUGACUCAAGUGAAGUACUAAGUAACCUUAUAUAU  
AUUAUAAGGGGAGACCUUCCYGCGGGCCAAGCAUUAACUGCUUUAGCUCGGAAG **UGA** GGAUACUCCUUA  
GCCUUAUGAUGAAAUUGCUACAAAUUCAUAGCAAACAUCAUGGUUGAACUAUUUAGUGCCUCACAACC  
UCAGCCUGGAAAAGGGAAACCGCUCGGAUUACUUGCCGAGAAUUCCUUAAUUUCCUGAACGGGAUGGCU  
GAGACUGGGGCCAAAGAACUAGAAGAAAACCCUGGUCTGAUGGAAUUCCACCAGAAUCCGCUGACCGAUAG  
UUAUGGAUCGAUAGAGCAGCAAUACCUUGAUUUUAUUAAGGAUUGCUAAGGAAAUUGACACUGUUAACAG  
GGUCAA **UGA** CCUUUGCUCUUAAGAUCUAUGACUAUCCCUUAUCCGAUCGAUUAUUUAUCGACCGAUUUG  
AGGAUACAGAGGUCAGGGCCCUGAAUUCUUUGGGAAAACCUUUGAAAGAAAGAUUUGAGGUACUAAAUCA  
GUACCCUCAACUUCUAAUUUC **UAG** GUUUUGACCCAAGGGUGCCACUCAAGGAGUGGACAAUGGGGAUUA  
CCCAUUGGAUUUCCCUUCUC **UGA** UAAGGAAGGGGAAAUCCCCGGUUCUACUCCUUCAGUUCCAAAAU

**Supplementary Figure 1-** Complete nucleotide sequence of *Fusarium oxysporum* f. sp. *dianthi* mitovirus 1 (FodMV1). The “start” and “stop” codons AUG and UAG, respectively, are indicated in green, and the six tryptophan codons UGA in red.
