# Supplementary material for: Characterization and Incidence of the First Member of the Genus Mitovirus Identified in the Phytopathogenic Species Fusarium oxysporum
Source: MDPI journal article supplement (doi:10.3390/v12030279), 2020-03-03
Supplement: s1 [file s1]

**Supplementary Table 1.** Specific primers and adapters used for the sequencing of FodMV1.

| <b>Name</b>           | <b>Sequence (5' → 3')</b>                                              |
|-----------------------|------------------------------------------------------------------------|
| <sup>a</sup> FodMV1RT | GTGGAATTCCATCAGACCAG                                                   |
| <sup>a</sup> FodMV1F1 | GACCATGATTACGCCAAGCTA                                                  |
| <sup>a</sup> FodMV1R2 | GCAAATTCACAGAAATGTGGAG                                                 |
| <sup>a</sup> FodMV1F3 | TTATGGATCGATAGAGCAGC                                                   |
| <sup>a</sup> FodMV1R4 | GAGTAGGCTCCCATCGGATT                                                   |
| <sup>a</sup> FodMV1F5 | TCCGCCACTGATAGATTTCC                                                   |
| <sup>a</sup> FodMV1R6 | AAGGAGTAGAACCGGGGATT                                                   |
| <sup>a</sup> FodMV1F7 | CAGGGAGCCGCTAATAACGG                                                   |
| <sup>a</sup> FodMV1R8 | CCATGTCAGTGTCTCGTGA                                                    |
| <sup>b</sup> END1     | CACGAGGACACTGACATGG                                                    |
| <sup>b</sup> END2     | ATGGACTGAAGGAGTAGAAC                                                   |
| <sup>c</sup> Mod1     | PO <sub>4</sub> -GGTTCTACTCCTTCAGTCCATGTCAGTGTCTCGTGC- NH <sub>2</sub> |

<sup>a</sup> Specific primers designed from the partial sequences of FodMV1.

<sup>b</sup> Primers for the RT (END1) and the PCR (END2) reactions, complementary to the 3'- adapter.

<sup>c</sup> 3'- adapter.
